# Supplementary material
Source: Springer Nature journal article supplement (https://www.springermedizin.de/resource/supplementary/13063_2007_235_MOESM1_ESM.pdf/9622354)

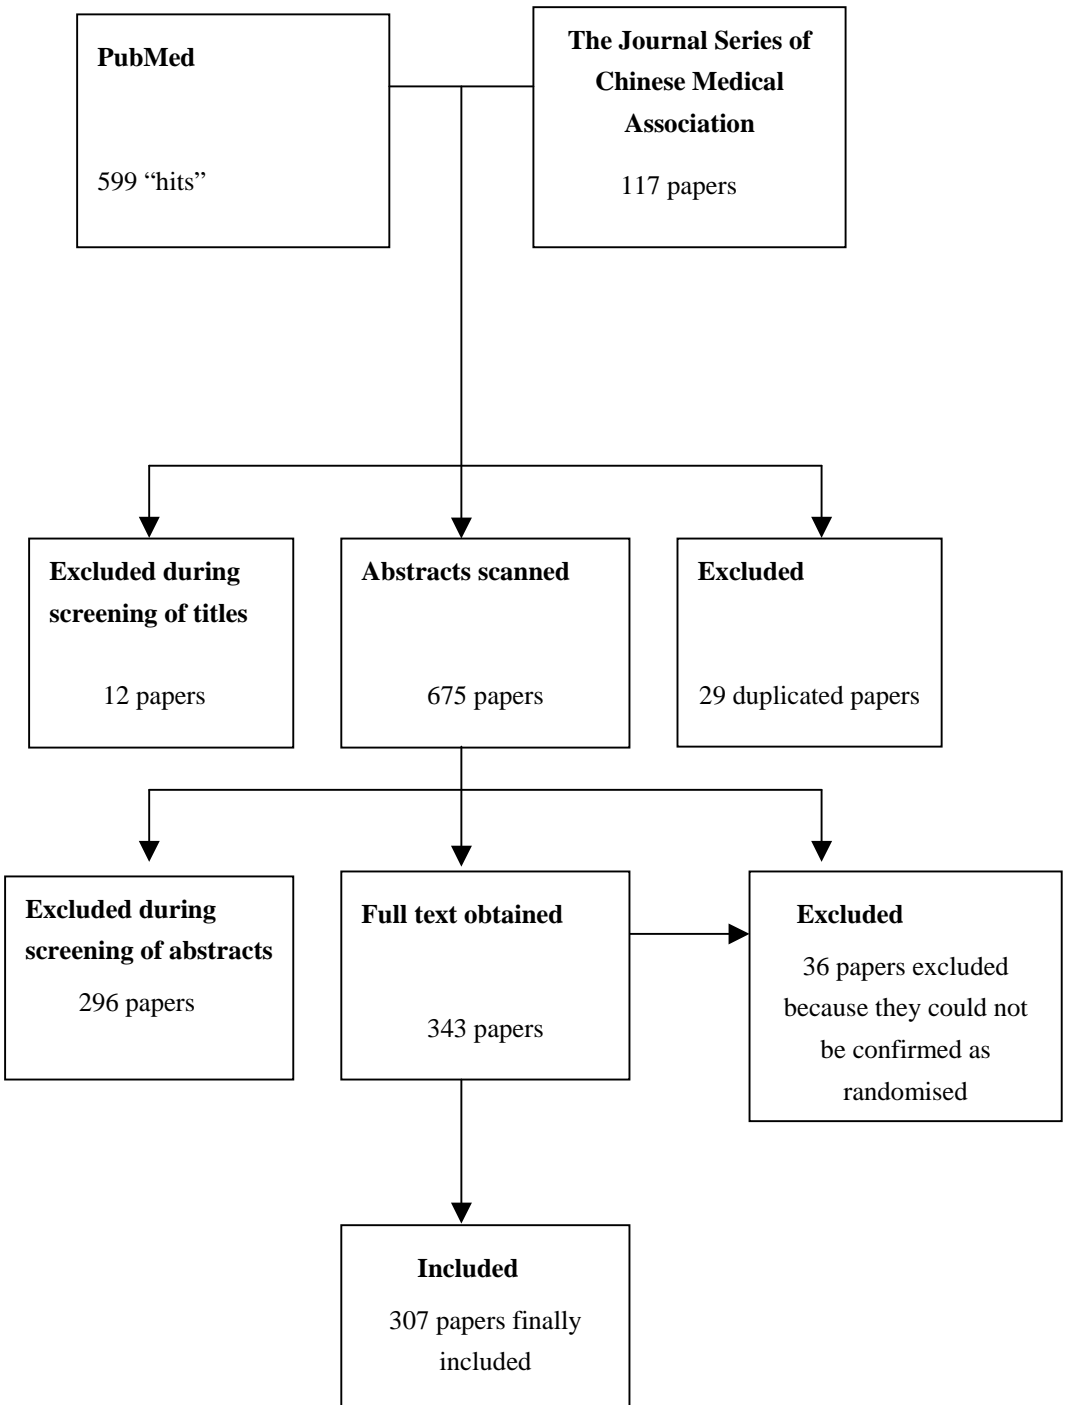

Supplement: MOESM1 [file 9622354]
